# Supplementary material for: Maternal Adaptive Immune Cells in Decidua Parietalis Display a More Activated and Coinhibitory Phenotype Compared to Decidua Basalis
Source: PubMed Central journal article supplement (PMC5727765; doi:10.1155/2017/8010961), 2017-11-29
Supplement: 8010961.f2.pdf [file 8010961.f2.pdf]

# Maternal adaptive immune cells in decidua parietalis display a more activated and co-inhibitory phenotype compared to decidua basalis

Martin Solders, Laia Gorchs, Sebastian Gidlöf, Eleonor Tiblad, Anna-Carin Lundell and Helen Kaipe

# Supplementary figure S1

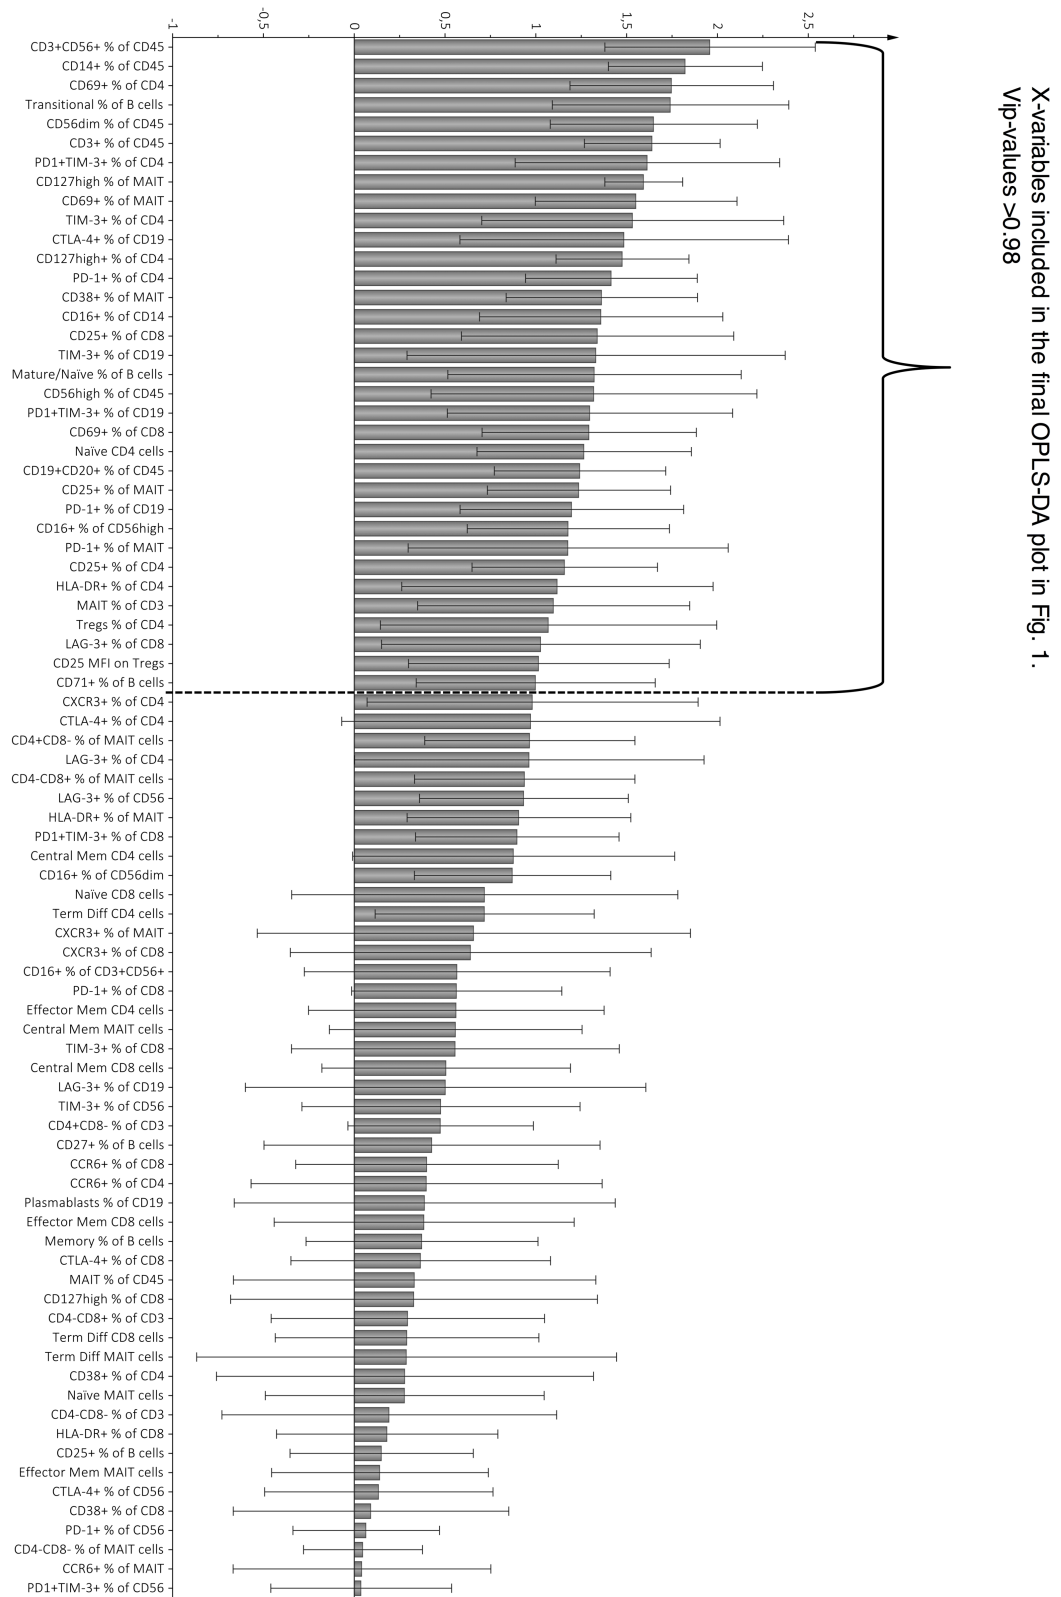

**Supplementary figure S1.** OPLS plot based on 81 parameters, showing associations between decidual compartment and phenotypic leukocyte markers ( $n = 8-13$ ).

## Supplementary figure S2

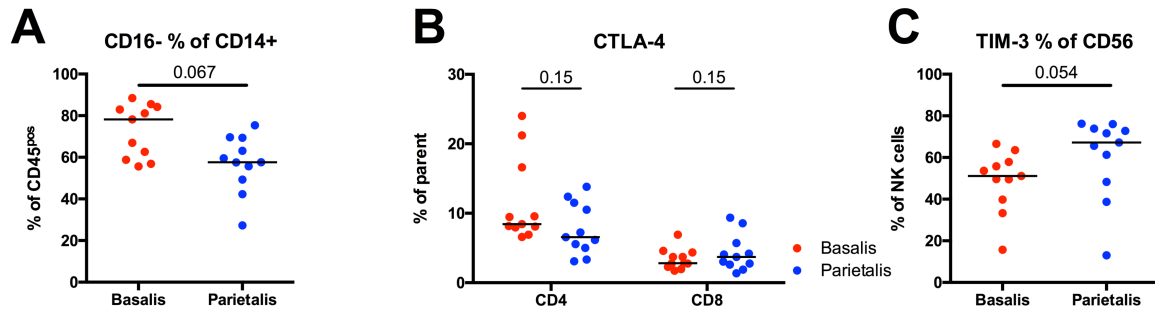

**Supplementary figure S2.** (A) Comparison between decidua basalis and parietalis regarding CD16 expression on CD14<sup>+</sup> monocytes ( $n = 11$ ). (B) Comparison between decidua basalis and parietalis regarding CTLA-4 expression on CD4<sup>+</sup> and CD8<sup>+</sup> T cells ( $n = 11$ ). (C) Comparison between decidua basalis and parietalis regarding TIM-3 expression on CD56<sup>+</sup> cells ( $n = 11$ ). Line in graphs depicts the median among values. Comparisons between the paired samples were made using the the non-parametric Wilcoxon test.

**Supplementary table S1.** Antibodies and viability dye used for flow cytometry.

| Surface markers    | Fluorochrome | Clone       | Source          |
|--------------------|--------------|-------------|-----------------|
| CD3                | V450         | UCHT1       | BD              |
| CD3                | FITC         | UCHT1       | BD              |
| CD3                | PE-Cy7       | UCHT1       | BD              |
| CD4                | V500         | RPA-T4      | BD              |
| CD4                | A700         | RPA-T4      | BD              |
| CD8                | APC-Cy7      | SK1         | BD              |
| CD8                | A700         | RPA-T8      | BD              |
| CD8                | APC          | SK1         | BD              |
| CD8                | PE-Cy7       | RPA-T8      | BD              |
| CD14               | FITC         | M $\phi$ P9 | BD              |
| CD16               | PE           | 3G8         | BD              |
| CD19               | PE-Cy7       | SJ25C1      | BD              |
| CD19               | PE-CF594     | HIB19       | BD              |
| CD20               | A700         | 2H7         | BD              |
| CD24               | FITC         | NL5         | BD              |
| CD25               | Bv421        | M-A251      | BD              |
| CD25               | PE           | M-A251      | BD              |
| CD27               | V500         | M-T271      | BD              |
| CD38               | Bv421        | HIT2        | BD              |
| CD45               | APC-H7       | 2D1         | BD              |
| CD45RA             | PE-Cy7       | HI100       | BD              |
| CD56               | APC          | NCAM16.2    | BD              |
| CD56               | Bv510        | NCAM16.2    | BD              |
| CD69               | FITC         | L78         | BD              |
| CD71               | APC-H7       | M-A712      |                 |
| CD127              | APC-A700     | R34.34      | Beckman Coulter |
| CD152 (CTLA-4)     | FITC         | A3.4H2.H12  | LS-Bio          |
| CD161              | PE           | HP-3G10     | BioLegend       |
| CD183 (CXCR3)      | APC          | 1C6/CXCR3   | BD              |
| CD196 (CCR6)       | FITC         | G034E3      | BioLegend       |
| CD197 (CCR7)       | PE-CF594     | 150503      | BD              |
| CD223 (LAG-3)      | PE           | REA351      | Miltenyi        |
| CD279 (PD-1)       | BV421        | EH12.1      | BD              |
| CD366 (TIM-3)      | APC          | F38-2E2     | Miltenyi        |
| HLA-DR             | FITC         | G46-6       | BD              |
| TCR V $\alpha$ 7.2 | APC-Cy7      | 3C10        | BioLegend       |
| -                  | 7AAD         | -           | BD              |

**Intracellular markers**

|                                |        |             |    |
|--------------------------------|--------|-------------|----|
| <b>Granzyme B</b>              | FITC   | GB11        | BD |
| <b>IFN-<math>\gamma</math></b> | PE-Cy7 | 4S.B3       | BD |
| <b>Perforin</b>                | A647   | $\delta$ G9 | BD |

Abbreviations; CD, Cluster of differentiation, BD, BD Biosciences (Franklin Lakes, NJ), FITC, Fluorescein isothiocyanate, PE-Cy7, Phycoerythrin-cyanine 7, A700, Alexa Fluor 700, APC, Allophycocyanine, PE, Phycoerythrin, Bv421, Brilliant violet 421, APC-H7, Allophycocyanine H7, APC-A700, Allophycocyanine Alexa Fluor 700, Beckman Coulter, Beckman Coulter (Fullerton, CA), BioLegend, Biolegend (San Diego, CA), PE-CF594, Phycoerythrin-CF 594, APC-Cy7, Allophycocyanine-indotricarbocyanine, Miltenyi, Miltenyi Biotec (Bergisch Gladbach, Germany), A488, Alexa Fluor 488, A647, Alexa Fluor 647, Bv510, Brilliant violet 510, LS-Bio, LifeSpan Biosciences Inc. (Seattle, WA).
